# Supplementary material for: Relative stability of the cis and trans isomers of octahedral cobalt(iii) complexes of the type [Co(N2O2)X2] with tetradentate salen type Schiff bases: a combined theoretical and experimental study
Source: Royal Society of Chemistry journal article supplement (doi:10.1039/c9ce00922a), 2019-01-01
Supplement: c9ce00922a1.pdf [file c9ce00922a1.pdf]

# Relative stability of cis and trans isomers of octahedral cobalt(III) complexes of the type $[\text{Co}(\text{N}_2\text{O}_2)\text{X}_2]$ with tetradentate salen type Schiff bases: A combined theoretical and experimental study

Kousik Ghosh<sup>a</sup>, Snehasis Banerjee<sup>b,\*</sup> and Shouvik Chattopadhyay<sup>a,\*</sup>

<sup>a</sup> Department of Chemistry, Inorganic Section, Jadavpur University, Kolkata-700032, India. Tel:

+913324572147 e-mail: [shouvik.chem@gmail.com](mailto:shouvik.chem@gmail.com)

<sup>b</sup> Department of Chemistry, Govt. College of Engineering and Leather Technology, Kolkata 700098

---

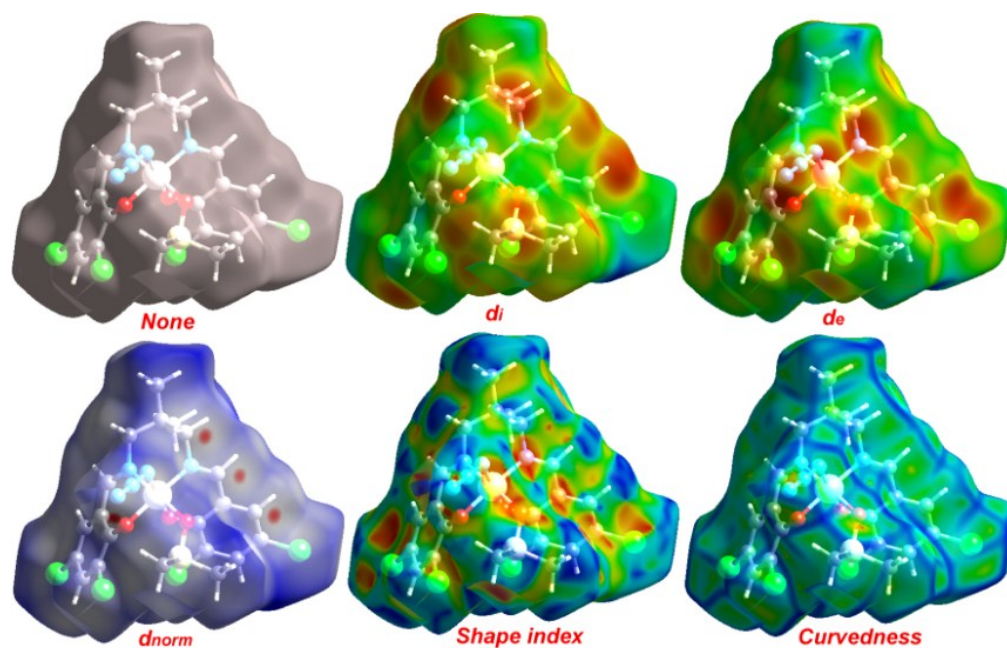

**Figure S1:** Hirshfeld surfaces of  $[\text{Co}^{\text{III}}\text{L}^a(\text{N}_3)(\text{DMSO})]$ , mapped with none,  $d_i$ ,  $d_e$ ,  $d_{\text{norm}}$ , shape index and curvedness.
